# Supplementary material for: Understanding Health Literacy in Otolaryngology Patients -Key Factors and Impact on Medical Practice
Source: Research Square preprint supplement (doi:10.21203/rs.3.rs-6328330/v1), 2025-05-13
Supplement: Supplementary file 1 [file 36149d51982fc742e08acb76.docx]

**Supplement**

**Supplement 1: Assumptions for the Multiple Linear Regression Models**

Across all models investigated in this study, it was observed that tolerance levels for collinearity fell within the range of 0.69 to 0.95, indicative of consistently low collinearity. Likewise, Variance Inflation Factor (VIF) values consistently remained below 10, suggesting that collinearity was not a significant concern across the various models. Scatter plots revealed a lack of strict linearity in the relationships between predictors and the outcome variables. The Durbin-Watson Test provided insights into potential issues with autocorrelation of residuals, necessitating cautious interpretation of model results. Visual inspections of standardized residuals against predicted values supported the assumption of homoscedasticity. Q-Q plots indicated normal distributions of residuals.

**Supplement 2**

***Model 1 – Diagnosis and Treatment***

In the first block of variables, the model incorporated information regarding patients' diagnoses, treatment locations, and -durations. The first model was found to be non-significant (*F*(8, 1684) = 1.33, *p* = .19), indicating that the predictors, as a group, did not significantly predict HL levels. The model accounted for a minimal amount of variance, with an *R²* of .01 and an adjusted *R²* of .005, suggesting that only a very small proportion of the variance in HL could be explained by the included variables. However, a notable finding emerged concerning specific diagnostic categories. Patients diagnosed with tumors exhibited, on average, -.31 units lower HL compared to individuals in the reference category "Other" (*p* = .003), holding all other variables in the model constant.

***Model 2 -Participation in research***

In the second model, which centered on patients' past and future participation aspirations in research, the analysis yielded non-significant results (*F*(2, 1791) = 1.60, *p* = 0.20). Specifically, both variables representing non-participation in research activities failed to show a significant impact on individuals' HL levels, irrespective of whether they had participated in research activities before or had plans to do so in the future. These findings remained consistent even after exchanging the reference categories. Consequently, no meaningful conclusions can be drawn about the model.

***Model 3 - Patient Orientation***

Model 3 incorporated factors related to patient orientation. Due to the substantial number of dummy-coded variables, the model was divided into three sub-models to accommodate a maximum of 13 independent variables in each model. In Model *3a*, the objective was to identify the specific areas of everyday life most affected by the disease and to what extent. Recognizing these aspects is crucial as it enables healthcare providers to address patients' needs effectively. Compared to areas categorized as "Other," patients facing physical changes had a significantly lower (*p* = 0.006) HL score of .25 units on average. Likewise, individuals burdened with worries and fears had a HL score of .34 units lower (*p* = 0.009) on average, in comparison to the reference group, indicating significantly lower HL levels in the former group. Experiencing financial difficulties, when compared to those in the reference category "Other," resulted in a significantly lower HL score by 1.61 units on average (*p* = 0.002). Individuals needing headphones to watch TV, as opposed to those in the "Other" category, exhibited a significantly lower HL score by an average of .645 units (*p* = .003). The model summary for Model 3a indicates that the variables included in the analysis explain a small but statistically significant portion of the variance in patients' HL (R2 = 0.022). The adjusted R2, which considers the number of predictors in the model, is .01. This suggests that the factors examined in this model could account for around 1.30 % of the variability in patients' HL scores.

In Model *3b*, the focus was placed on variables related to the decision-making process, specifically examining the role the patient currently plays and desires to play, as well as how often the patients' preferences are taken into account. The analysis revealed that this model including patients' preferences and roles in decision-making significantly impacted their HL (*F* = 2.02, *p* = .02). The specific roles patients assume in their healthcare decisions were explored and revealed three important factors: Patients who make all decisions independently after being informed comprehensively compared to those who prefer joint decisions exhibited a significantly higher HL score by .22 units (*p* = .01) on average. Interestingly, patients who preferred the ENT doctor to make the final decision after mutual discussion in contrast to those preferring joint decisions, showed a slightly higher HL score of .29 units (*p* = .047) on average. The last significant variable from this model included patients who actively participate in decision-making compared to those who prefer joint decisions. Being active in this process led to higher HL scores by .23 units (*p* = .04) on average. Model *3b* accounted for 1.40% of the variance in HL (R2 = .014; adjusted R2 = 0.007), suggesting a limited but statistically significant influence of patients' decision-making roles on their HL skills.

In Model *3c*, aspects related to patient-doctor communication and engagement in the medical decision-making process were examined to understand their impact on HL. The model did not achieve statistical significance (*p* = .116), suggesting that the combined impact of these variables on HL was not statistically significant.

Combining the identified variables, the conclusive and significant Model 3 included 8 variables (*F* = 7.62, *p* < .001). These variables collectively accounted for 4.00% of the variance in the dependent variable HL (adjusted *R²* = .04). When considering individuals dealing with physical changes, the HL score was, on average, 0.24 units lower compared to those not facing physical changes (*p* = 0.004), suggesting that individuals struggling with physical changes had lower HL, holding all other variables constant. Similarly, individuals experiencing many worries and anxieties had, on average, a HL score 0.38 units lower than those without such worries. This effect was statistically significant (*p* = .003), indicating that individuals burdened by worries and fears had lower HL, holding all other variables constant. Additionally, those facing financial problems exhibited a substantial decrease in HL, with a score of 2.00 units lower on average compared to those without financial issues. This effect was highly significant (*p* < .001), holding all other variables constant. People needing headphones to watch TV had, on average, a HL score 0.83 units lower than those not requiring headphones. This effect was highly significant (*p* < .001) as well, holding all other variables constant. Furthermore, the doctor taking enough time for the conversation resulted in a HL score on average 0.32 units lower than those for whom this did not apply. This effect was highly significant (*p* < .001), indicating that the doctor's time allocation significantly affects HL, holding all other variables constant. Patients making all decisions after being thoroughly informed by their doctor exhibited an HL score on average 0.19 units lower than those in other decision-making scenarios. This effect was statistically significant (*p* = .01), holding all other variables constant.

***Model 4 - Medical information Search***

Model 4 was split into two smaller models for a focused investigation into ENT healthcare information seeking. Model *4a* concentrated on patients` perceptions of their information reception during the treatment process and any changes in their information needs from the onset of their illness to the present. In Model *4b*, various information sources were investigated, including individuals such as family and friends, as well as online platforms and context.

The final model for the fourth variable block consisted of variables examining patients' interaction with their families, general practitioners, and being comprehensively informed about their treatment. This model revealed a significant overall relationship between these variables and HL. The model's adjusted R-squared value of .016 indicated that approximately 1.6% of the variance in HL could be explained by these factors. The ANOVA results demonstrated the model's statistical significance (*F* = 6.115, *p* < .001). Notably, patients who tend to consult family members about their diagnosis exhibited significantly lower HL, denoted by the coefficient of, on average, -0.36 (*p* < .001), holding all other variables constant. Furthermore, respondents who only tended to agree with being well-informed about steps in their treatment showcased lower HL of, on average, 0.156 units (*p* = .03), holding all other variables constant.

***Model 5 – Demographics***

This analysis entered a comprehensive set of demographic variables into the model to assess their influence on HL. The inclusion of variables considering factors such as gender, educational levels, and age groups in Model *5a* revealed a significant outcome for the model including demographic variables (*F* = 8.98, *p* < .001). Being female indicated a notable positive influence on HL (β = .12, *p* < .001), indicating that being female provided significantly higher HL scores than not being female, holding all other variables constant. Educational levels also played a significant role; individuals with A-Levels (Abitur) had higher HL scores (*β* = .14, *p* < .001), whereas having a Secondary School Certificate had a negative impact on patients' HL (*β* = -.06, *p* = .04). These results showed lower HL scores for patients with a lower educational background compared to those with higher education. Regarding age groups, the differences in patients' HL were not statistically significant. Model *5b*, including the 16 different federal states of Germany did not reach statistical significance (*F* = 1.16, *p* = .30).

**Supplement Figure 1**

Distribution of HL Scores in the Subsample for the Elastic Net Regression


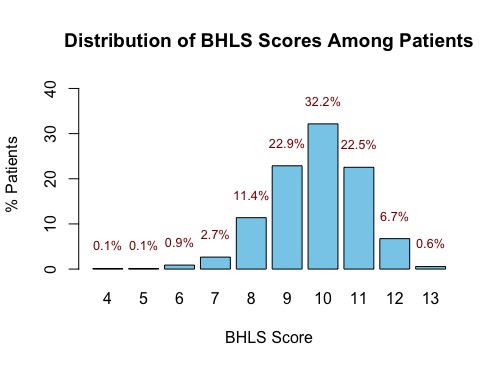


**Supplement Table 1**

*Legend: Variables and Coefficients retrieved from the Elastic Net Regression*

| Variable | coefficient |
| --- | --- |
| I have financial issues. | -1.575 |
| HL3Often | -.259 |
| Wishes_consideredNever | -.194 |
| fed_stateSaarland | -.172 |
| Wishes_rathernotconsidered | -.148 |
| Person_QuestionFriends | -.053 |
| highest_EducationAnother type of degree | -.050 |
| highest_EducationAnother type of degree_2 | -.039 |
| DiagnosisSleep disorders | -.038 |
| Goal_SearchSeeking other doctors for a second opinion | -.035 |
| Acknowledging patient preferences (e.g. wishes, expectations) | -.035 |
| fed_stateBerlin | -.033 |
| ImpactAre_I avoid meetings with family and friends. | -.026 |
| Decision_1All decisions are made by me after thoroughly being informed. | -.024 |
| The doctor shows empathy for the patient. | -.022 |
| GoalInformationsearch_detailed information about treatment processes | -.017 |
| Location_otolaryngology clinic | -.016 |
| Male | -.014 |
| TreatmentDuration>5years | -.012 |
| Decisions are made by otolaryngologist. | -.011 |
| fed_stae Rhineland-Palatinate | -.010 |
| Wishes_consideredFullyagree | -.008 |
| Decisionmaking_together | -.008 |
| Physicians answering every question | -.007 |
| Person_Question_MultipleAnswers | -.005 |
| Decisionmaking_passive | -.003 |
| ElectronicSourceOfInformation_Multiple | -.002 |
| fed_stateHamburg | -.002 |
| PatientOrientation | .000 |
| age61-75 years | .001 |
| Person_Question otolaryngologist | .002 |
| Wishes_considered_I neither agree nor disagree | .002 |
| I tend to agree that the disease has a great impact on my daily life. | .003 |
| I have never participated in a research study. | .004 |
| All of the statements play an important role in communication. | .005 |
| Wishes_consideredRarely | .006 |
| The physician explains details of the procedure in an understandable way. | .006 |
| ElectronicSourceOfInformation_General Internet search engines (e.g. Wikipedia) | .006 |
| Duration 1-2 years | .007 |
| GoalInformationsearch_ Simplification of medical issues | .007 |
| I’m no longer able to drive on my own. | .009 |
| secondary school qualification or equivalent | .011 |
| Diagnosis_SmellTasteHearingDisorders | .012 |
| fed_stateBrandenburg | .013 |
| fed_stateNorth Rhine-Westphalia | .014 |
| Wishes_consideredOften | .015 |
| Partner_Relationship Honesty | .019 |
| fed_stateLower Saxony | .027 |
| Diagnosis_VoiceAndSpeechDisorders | .029 |
| I had to completely change my diet. | .030 |
| Never been to this ENT clinic/practice and cannot judge. | .031 |
| highest_EducationLeft school without a degree | .117 |
| Health_Competency_median_cat | .254 |
| HL2Often | .404 |
| HL3Occasionally | .694 |
| HL1Very confident | .814 |
| fed_stateMultiple answers | 1.298 |
| HL2Occasionally | 1.346 |
| HL3Rarely | 1.559 |
| HL1Not very sure | 1.740 |
| HL2Rarely | 2.225 |
| HL3Never | 2.479 |
| HL1Rather unsure | 2.648 |
| HL2Never | 3.100 |
| HL1Not at all sure | 3.187 |

The table includes details such as variable names and standardized regression coefficients.

The Elastic Net Model RSME was .12.

**Supplement Table 2: Variable Abbreviation Legend Elastic Net Regression**

| Abbreviation | Variable Description |
| --- | --- |
| HL1NAAS | HL1Not at all sure |
| HLN | HL2Never |
| HL1RU | HL1Rather unsure |
| HL3N | HL3Never |
| HL2R | HL2Rarely |
| HL1NVS | HL1Not very sure |
| FI | I have financial issues. |
| HL3R | HL3Rarely |
| HL2OC | HL2Occasionally |
| FDMA | fed_stateMultiple answers |
| HL1VS | HL1Very confident |
| HL3OC | HL3Occasionally |
| HL2O | HL2Often |
| HL3O | HL3Often |
| HLM | Health_Competency_median_cat |
| WCN | Wishes_consideredNever |
| FS12 | fed_stateSaarland |
| WRNC | Wishes_rathernotconsidered |
| NSQ | highest_EducationLeft school without a degree |
| ISF | Person_QuestionFriends |
| OSQ | School_TypeOther |
| OSQ2 | highest_EducationAnother type of degree |
| DSD | DiagnosisSleep disorders |
| GISSO | Goal_SearchSeeking other doctors for a second opinion |
| POWC | Acknowledging patient preferences (e.g. wishes, expectations) |
| FS3 | fed_stateBerlin |
| WCNA | Never been to this otolaryngology clinic/practice and cannot judge. |
| CD | I had to completely change my diet. |
| DVS | DiagnosisVoice and speech disorders |
| FS9 | fed_stateLower Saxony |
| AFF | Impact_AreaI avoid meetings with family and friends. |
| DMAAI | Decision_1All decisions are made by me after (...) |
| EMP | The doctor shows empathy for the patient. |
| HON | Partner_Relationship Honesty |
